# Supplementary material
Source: publisher site journal article supplement (https://www.dovepress.com/article/419796)
Supplement: Supplementary file 1 [file get_supplementary_file.php]

**Table S1 Sociodemographic characteristics of the study subjects (*n*=128)**

| **Characteristics** | **Case number** | **Percentage (%)** |  | **Characteristics** | **Case number** | **Percentage (%)** |
| --- | --- | --- | --- | --- | --- | --- |
| **Sex** |  |  |  | **Nation** |  |  |
| Female | 52 | 40.6 |  | Han Chinese | 128 | 100 |
| Male | 76 | 59.4 |  | Others | 0 | 0 |
| **Age (years)** |  |  | 68.19±15.51 | **Marriage** |  |  |
| 30~ | 9 | 7.0 |  | Unmarried | 4 | 3.1 |
| 45~ | 30 | 23.5 |  | Married | 98 | 76.6 |
| 60~92 | 89 | 69.5 |  | Divorced | 2 | 1.6 |
| **BMI (kg/m2)** | |  | 24.05±3.97 | Death of a spouse | 24 | 18.8 |
| 16.7~ | 9 | 7.0 |  | **Drinking** |  |  |
| 18.5~ | 58 | 45.3 |  | Never drinking | 85 | 66.4 |
| 24.0~39.0 | 61 | 47.7 |  | Previous drinking | 34 | 26.6 |
| **Smoking** |  |  |  | Drinking | 9 | 7.0 |
| Never smoking | 75 | 58.6 |  | **Occupation** |  |  |
| Previous smoking | 32 | 25.0 |  | Worker/Farmer | 24 | 18.8 |
| smoking | 21 | 16.4 |  | Individual operator | 4 | 3.1 |
| **Per capita monthly household income (Yuan/month）** | | |  | Unemployed | 10 | 7.8 |
| ≤4000 | 38 | 29.7 |  | Enterprises/institution | 13 | 10.1 |
| 4001~8000 | 36 | 28.1 |  | Retired | 77 | 60.2 |
| ＞8000 | 54 | 42.2 |  | **Medical expenses payment method** | |  |
| **Highest Education** | | |  | [Worker with medical insurance](javascript:;) | 61 | 47.7 |
| Primary school education or below | 50 | 39.0 |  | [medical insurance for urban residents](javascript:;) | 20 | 15.6 |
| Junior high school | 39 | 30.5 |  | New rural cooperative medical system | 13 | 10.2 |
| Senior middle school or secondary technical school | 6 | 4.7 |  | Public expense | 23 | 18.0 |
| College degree and above | 33 | 25.8 |  | [Self-paying](javascript:;) | 11 | 8.6 |
| **Attitude towards the disease** | | |  | **Place of residence** |  |  |
| Optimistic | 14 | 10.9 |  | Provincial capital city | 96 | 75.0 |
| More optimistic | 71 | 55.5 |  | [Prefecture-level city](javascript:;) | 18 | 14.1 |
| [Pessimistic](javascript:;) | 37 | 28.9 |  | Township | 6 | 4.7 |
| Very [pessimistic](javascript:;) | 6 | 4.7 |  | [country](javascript:;) | 8 | 6.3 |
| **Living situation** | | |  |  |  |  |
| Live alone | 11 | 8.6 |  |  |  |  |
| Living with others | 117 | 91.4 |  |  |  |  |

Abbreviation: BMI, body mass index.

Note: The items of the characteristics are shown in bold. Age was divided according to the World Health Organization (WHO). Age ≤ 44 years is young, age 45-59 years is middle-aged, and age ≥ 60 years is old. BMI was classified according to the Guidelines for the Prevention and Control of Overweight and Obesity in Adults in China (Trial) 2003 edition. Previous smokers/alcoholics are those who have stopped smoking or drinking for at least six months.

**Table S2 Disease characteristics and laboratory test results of the study subjects (*n*=128)**

| **Characteristics** | **Case number** | **Percentage (%)** | 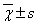 |
| --- | --- | --- | --- |
| **Course of disease (years)** |  |  | 4.85±6.11 |
| ＜1 | 37 | 28.9 |  |
| About 1 | 23 | 18 |  |
| About 3 | 21 | 16.4 |  |
| About 5 | 47 | 36.7 |  |
| **NYHA classification of cardiac function** |  |  |  |
| Ⅱ | 27 | 21.1 |  |
| Ⅲ | 58 | 45.3 |  |
| Ⅳ | 43 | 33.6 |  |
| **Serum potassium (mmol/L)** |  |  | 4.10±0.67 |
| Abnormal | 18 | 14.1 |  |
| Normal: 3.5~5.3 | 110 | 85.9 |  |
| **Serum sodium (mmol/L)** |  |  | 138.09±5.63 |
| Abnormal | 38 | 29.7 |  |
| Normal: 137~147 | 90 | 70.3 |  |
| **Prealbumin** (mg/L) |  |  | 177.07±65.05 |
| < 200 | 87 | 68 |  |
| ≥ 200 | 41 | 32 |  |
| **LVEF** | | | 46.35±16.15 |
| ≤40 | 54 | 42.2 |  |
| 40~50 | 19 | 14.8 |  |
| ≥50 | 55 | 43 |  |
| **Whether left ventricular diastolic function is reduced** | | |  |
| Yes | 95 | 74.2 |  |
| No | 33 | 25.8 |  |
| **Types of medicine** | | |  |
| 1~3 | 40 | 31.3 |  |
| 4~6 | 52 | 40.6 |  |
| ＞6 | 36 | 28.1 |  |
| **Number of hospitalizations within six months** | | |  |
| Once | 75 | 58.6 |  |
| Twice | 31 | 24.2 |  |
| 3 times or more | 22 | 17.2 |  |
| **Type of comorbidity** | | |  |
| None | 8 | 6.3 |  |
| 1 | 51 | 39.8 |  |
| 2 | 42 | 32.8 |  |
| 3 or more | 27 | 21.1 |  |
| **C-reaction protein (mg/L)** | | |  |
| ≤6.0 | 56 | 43.8 |  |
| ＞6.0 | 72 | 56.2 |  |
| **BNP precursor (pg/mL)** | | |  |
| 4640 (2400，10850)* | | |  |

Abbreviation: NYHA, New York Heart Association; LVEF, left ventricular ejection fraction; BNP, B-type natriuretic peptide.

Notes: The items of the characteristics are shown in bold. * represents the median (interquartile range).
